# Supplementary material for: Unexpected fluorescence from maleimide-containing polyhedral oligomeric silsesquioxanes: nanoparticle and sequence distribution analyses of polystyrene-based alternating copolymers
Source: Royal Society of Chemistry journal article supplement (doi:10.1039/c5py01537e), 2015-10-20
Supplement: c5py01537e1.pdf [file c5py01537e1.pdf]

## Supporting Information for

### Unexpected Fluorescence from Maleimide-Containing Polyhedral Oligomeric Silsesquioxanes Nanoparticle and Sequence Distribution Analyses of Polystyrene-Based Alternating Copolymers

Mohamed Gamal Mohamed,<sup>a</sup> Kuo-Chih Hsu<sup>a</sup>, Jin-Long Hong<sup>a</sup> and Shiao-Wei Kuo<sup>a,b\*</sup>

<sup>a</sup>Department of Materials and Optoelectronic Science, National Sun Yat-Sen University, Kaohsiung, Taiwan.

<sup>b</sup>Department of Medicinal and Applied Chemistry, Kaohsiung Medical University, Kaohsiung, Taiwan.

E-mail: kuosw@faculty.nsysu.edu.tw

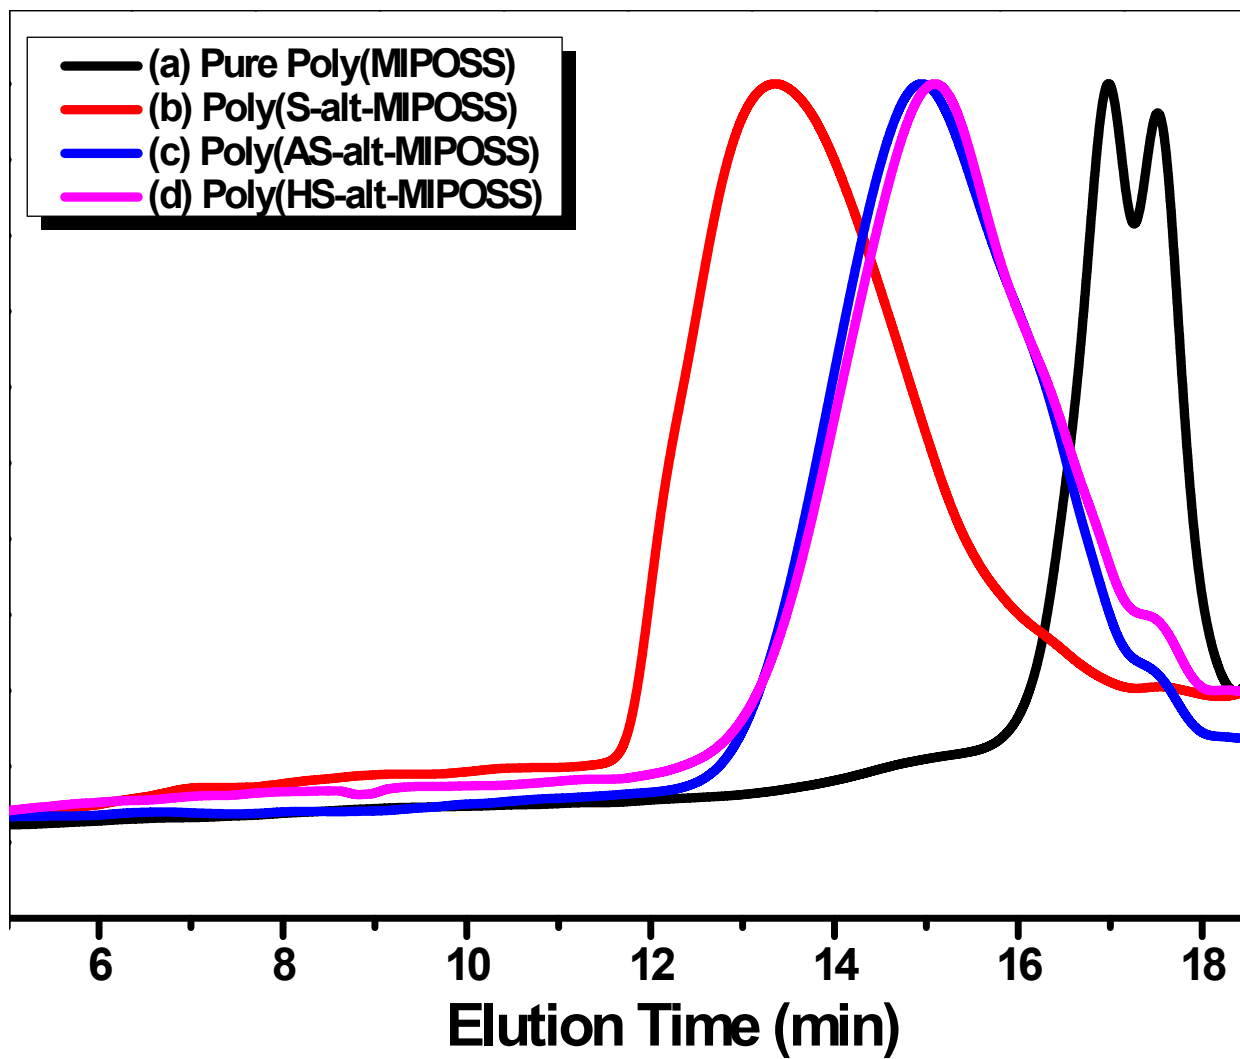

**Figure S1:** GPC traces of (a) Pure poly(MIPOSS), (b) poly(S-alt-MIPOSS), (c) poly(AS-alt-MIPOSS), and (d) poly(HS-alt-MIPOSS).

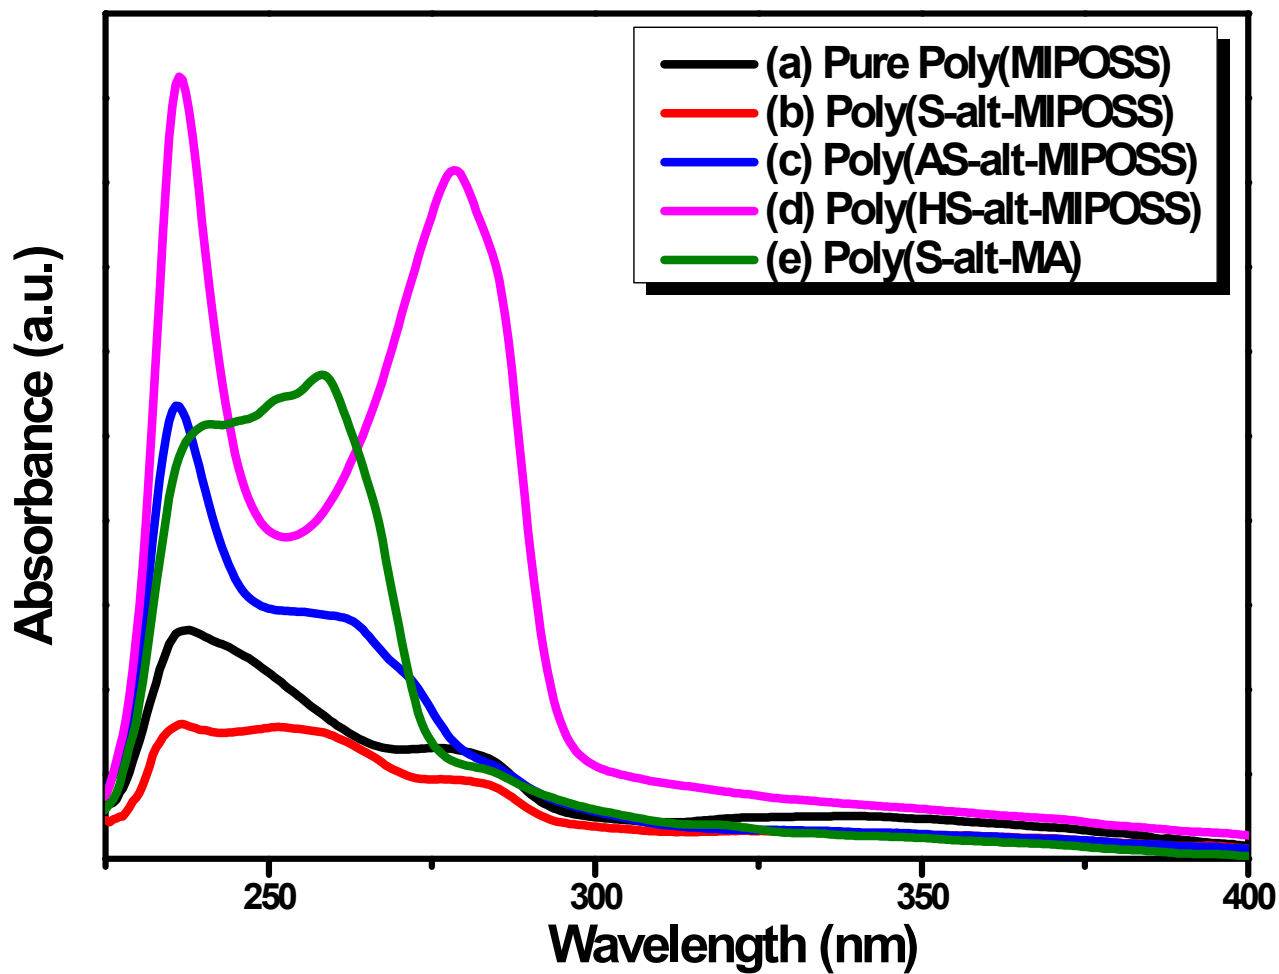

Figure S2: UV-visible absorption spectra of (a) Pure poly(MIPOSS), (b) poly(S-alt-MIPOSS), (c) poly(AS-alt-MIPOSS), (d) poly(HS-alt-MIPOSS), and (e) poly(S-alt-MA) in THF solution ( $10^{-4}$  M).

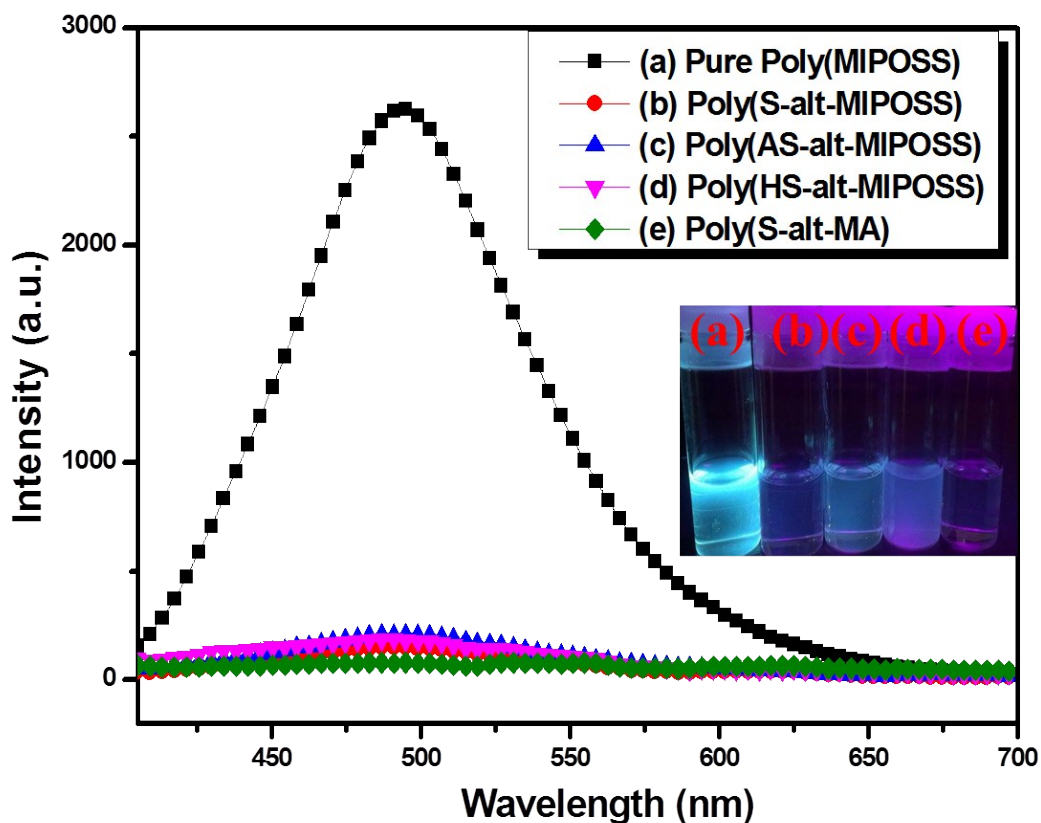

**Figure S3:** PL spectra of (a) Pure Poly(MIPOSS), (b) Poly(S-alt-MIPOSS), (c) Poly(AS-alt-MIPOSS), (d) Poly(HS-alt-MIPOSS), and (e) Poly(S-alt-MA) in  $1 \times 10^{-3}$  M THF solution (excited at 330 nm). Insets are the fluorescence images of (a) Pure Poly(MIPOSS), (b) Poly(S-alt-MIPOSS), (c) Poly(AS-alt-MIPOSS), (d) Poly(HS-alt-MIPOSS), and (e) Poly(S-alt-MA) in THF solution under 365 nm UV light.

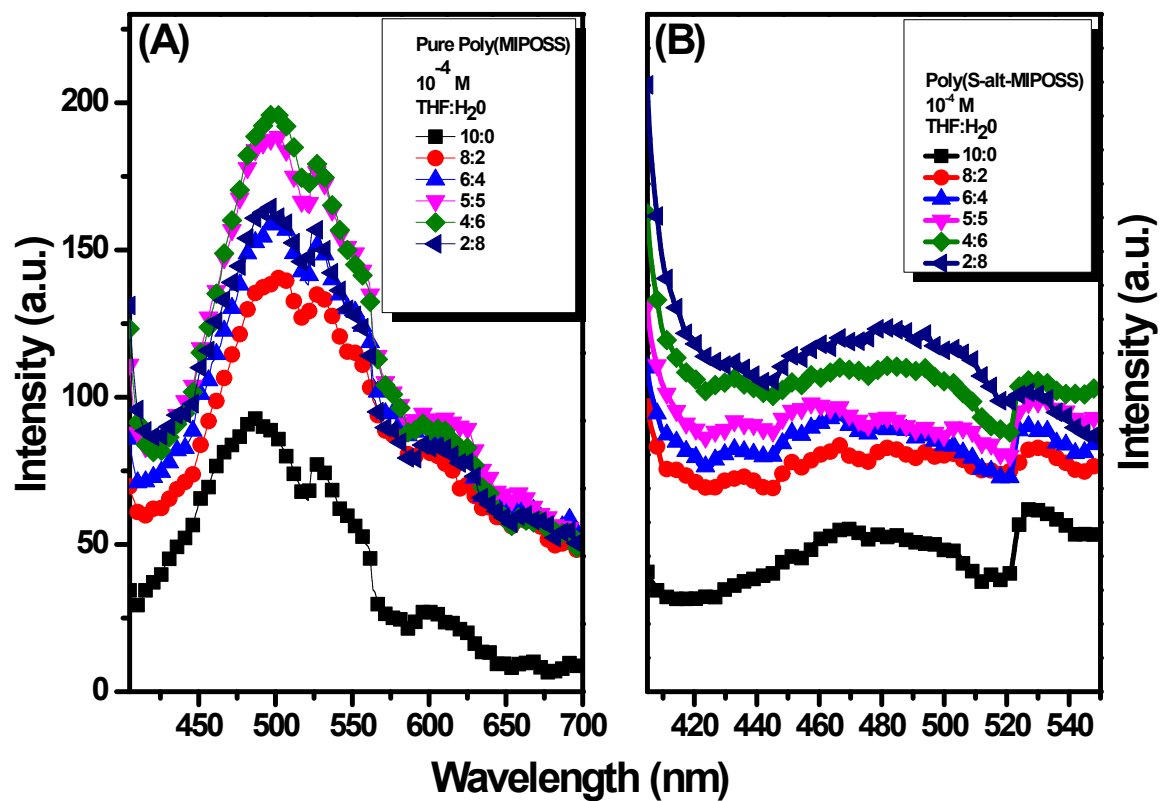

**Figure S4:** Photoluminescence spectra of (A) Pure poly(MIPOSS) and (B) poly(S-alt-MIPOSS) in THF-water solvent mixtures with the concentration  $1 \times 10^{-4}$  M (excited at 330 nm).

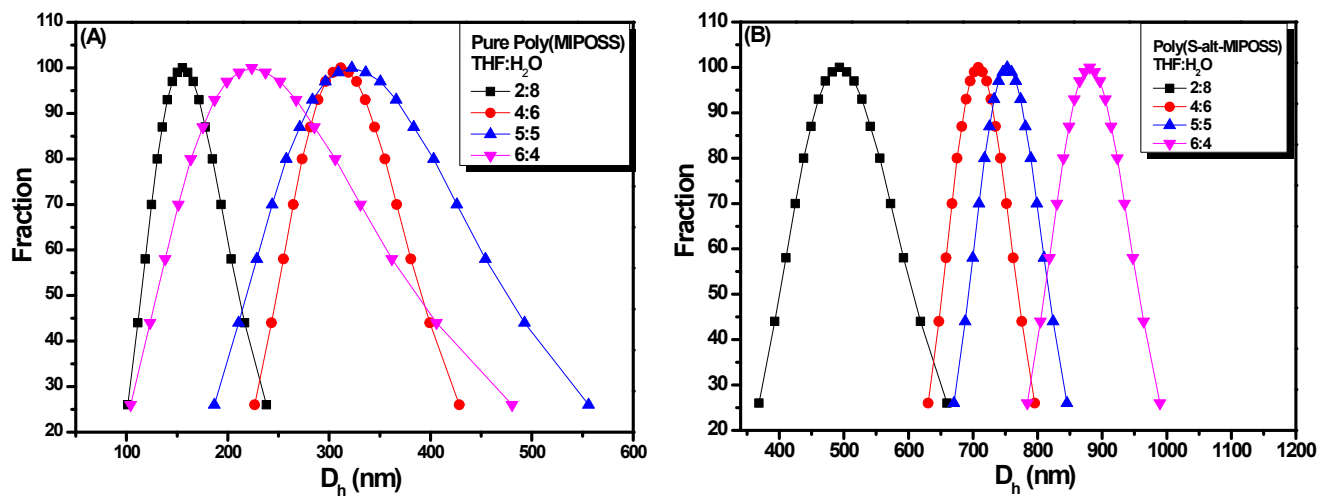

**Figure S5:** Histograms of hydrodynamic diameters of (A) Pure Poly(MIPOSS) and (B) Poly(S-alt-MIPOSS) in THF-water solvent mixtures containing different water content from 0 to 80%.
